# Supplementary material for: Cycle Tracks and Parking Environments in China: Learning from College Students at Peking University
Source: Int J Environ Res Public Health. 2017 Aug 18;14(8):930. doi: 10.3390/ijerph14080930 (PMC5580632; doi:10.3390/ijerph14080930)
Supplement: Supplementary file 1 [file ijerph-14-00930-s001.pdf]

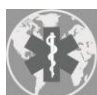

# Supplementary Materials: Cycle Tracks and Parking Environments in China: Learning from College Students at Peking University

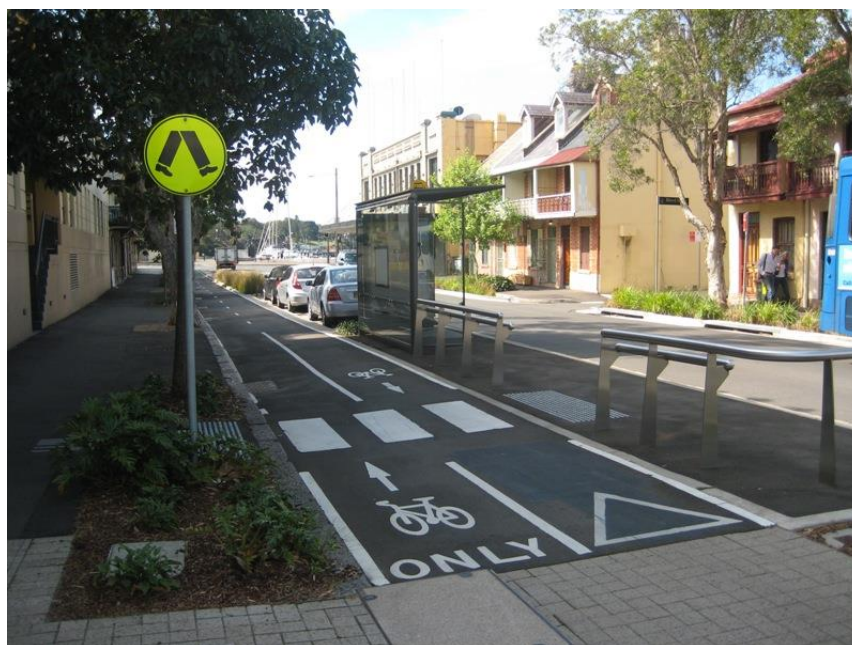

**Figure S1.** Cycle track and bus stop design in Australia.

**Table S1.** Picture-aided bicycle route questions in the survey.

| Route Type/Condition                                                                                                          | Picture | Preference * | Perceived Safety <sup>‡</sup> |
|-------------------------------------------------------------------------------------------------------------------------------|---------|--------------|-------------------------------|
| Route 1: Mixed road for cars, bicyclists and pedestrians                                                                      |         | ①—⑤          | ①—⑤                           |
| Route 2: Mixed road for cars and bicyclists                                                                                   |         | ①—⑤          | ①—⑤                           |
| Route 3: Bicycle lanes separated by painted lines                                                                             |         | ①—⑤          | ①—⑤                           |
| Route 4: Cycle tracks (barriers separating cycle tracks from moving cars include metal barrier, trees and other plants, etc.) |         | ①—⑤          | ①—⑤                           |
| Condition 1: Cycle track sharing with parked cars                                                                             | N/A     | ①—⑤          | ①—⑤                           |
| Condition 2: Cycle track sharing with bus stops                                                                               | N/A     | ①—⑤          | ①—⑤                           |
| Condition 3: Cycle track sharing with moving cars                                                                             | N/A     | ①—⑤          | ①—⑤                           |

\* ① Strongly preferred, ② Preferred, ③ Neutral, ④ Not preferred, ⑤ Strongly not preferred.

<sup>‡</sup> ① Very safe, ② Safe, ③ Neutral, ④ Unsafe, ⑤ Very unsafe.
